1 **Time-kill curve analysis and pharmacodynamic functions for *in vitro* evaluation of**  
2 **antimicrobials against *Neisseria gonorrhoeae***

3

4 Sunniva Foerster<sup>a,b,c</sup>, Magnus Unemo<sup>c</sup>, Lucy J. Hathaway<sup>a</sup>, Nicola Low<sup>b</sup>, Christian  
5 L. Althaus<sup>b#</sup>

6

7 Institute for Infectious Diseases, University of Bern, Bern, Switzerland<sup>a</sup>; Institute of Social  
8 and Preventive Medicine (ISPM), University of Bern, Bern, Switzerland<sup>b</sup>; WHO

9 Collaborating Centre for Gonorrhoea and other STIs, National Reference Laboratory for

10 Pathogenic *Neisseria*, Faculty of Medicine and Health, Örebro University, Örebro, Sweden<sup>c</sup>

11

12 **Running title:** Time-kill curve analysis for *Neisseria gonorrhoeae*

13 **Word count:** Abstract 249 words, Text: 6247 words

14 #Address correspondence to Christian L. Althaus

15 Finkenhubelweg 11

16 3012 Bern

17 Email: [christian.althaus@alumni.ethz.ch](mailto:christian.althaus@alumni.ethz.ch)

18 Telephone: +41 (0)31 631 56 40

19

20 **Gonorrhoea is a sexually transmitted infection caused by the Gram-negative bacterium**  
21 ***Neisseria gonorrhoeae*. Resistance to first-line empirical monotherapy has emerged, so**  
22 **robust methods are needed to appropriately evaluate the activity of existing and novel**  
23 **antimicrobials against the bacterium. Pharmacodynamic functions, which describe the**  
24 **relationship between the concentration of antimicrobials and the bacterial net growth**  
25 **rate, provide more detailed information than the MIC only. In this study, a novel**  
26 **standardized *in vitro* time-kill curve assay was developed. The assay was validated using**  
27 **five World Health Organization *N. gonorrhoeae* reference strains and various**  
28 **concentrations of ciprofloxacin, and then the activity of nine antimicrobials with different**  
29 **target mechanisms were examined against a highly susceptible clinical wild type isolate**  
30 **(cultured in 1964). From the time-kill curves, the bacterial net growth rates at each**  
31 **antimicrobial concentration were estimated. Finally, a pharmacodynamic function was**  
32 **fitted to the data, resulting in four parameters that describe the pharmacodynamic**  
33 **properties of each antimicrobial. Ciprofloxacin resistance determinants shifted the**  
34 **pharmacodynamic MIC (zMIC) and attenuated the bactericidal effect at antimicrobial**  
35 **concentrations above the zMIC. Ciprofloxacin, spectinomycin and gentamicin had the**  
36 **strongest bactericidal effect during the first six hours of the assay. Only tetracycline and**  
37 **chloramphenicol showed a purely bacteriostatic effect. The pharmacodynamic functions**  
38 **differed between antimicrobials, showing that the effect of the drugs at concentrations**  
39 **below and above the MIC vary widely. In conclusion, *N. gonorrhoeae* time-kill curve**  
40 **experiments analyzed with pharmacodynamic functions have potential for *in vitro***  
41 **evaluation of new and existing antimicrobials and dosing strategies to treat gonorrhoea.**

42 **Keywords:** *Neisseria gonorrhoeae*; gonorrhoea; treatment; antimicrobial resistance; time-kill  
43 curve analysis; pharmacodynamic function

44

45 Antimicrobial resistance in *Neisseria gonorrhoeae* is a major public health problem. Strains of  
46 *N. gonorrhoeae* have developed resistance to all antimicrobials introduced for treatment and  
47 rare strains have been classified as superbugs. Clinical resistance to the last option for empirical  
48 antimicrobial monotherapy, ceftriaxone, was firstly described in 2009 (1, 2). Currently,  
49 treatment recommendations for gonorrhea and prediction of the efficacy of antimicrobials  
50 mainly rely on a single measurement: the MIC of the antimicrobial. However, antimicrobials  
51 that have different modes of action and lead to different treatment outcomes can have identical  
52 MICs (2). A better understanding of the *in vitro* pharmacodynamic properties of antimicrobials  
53 could be used to optimize dosing strategies and help prevent treatment failures (3).

54 Regoes et al. (4) introduced the concept of pharmacodynamic functions to study the  
55 relationship between bacterial net growth rates and the concentrations of antimicrobials, based  
56 on analyses of time-kill curves for a single laboratory strain of *Escherichia coli*.  
57 Mathematically, the pharmacodynamic function is based on a Hill function and characterized  
58 by four parameters: the maximal bacterial growth rate in the absence of antimicrobial ( $\psi_{\max}$ ),  
59 the minimal bacterial growth rate at high concentrations of antimicrobial ( $\psi_{\min}$ ), the Hill  
60 coefficient ( $\kappa$ ), and the pharmacodynamic MIC (zMIC) (Figure 1).  
61 Information about the effects of antimicrobials at concentrations below and above the MIC is  
62 particularly valuable for pathogens like *N. gonorrhoeae*, for which there are limited data about  
63 the pharmacokinetic and pharmacodynamic effects of many antimicrobials. Furthermore, the  
64 pharmacodynamic properties of novel antimicrobials with known and unknown targets could  
65 be evaluated and directly compared to a set of mechanistically well-understood compounds.

66 There is no standardized and quality assured procedure for time-kill curve analysis of the  
67 fastidious obligate human pathogen *N. gonorrhoeae*. Published time-kill protocols for *N.*  
68 *gonorrhoeae* (5–7) are not generalizable, owing to the highly divergent growth requirements of  
69 different strains and interpretation of results generally relies on qualitative expert judgement.  
70 To study a wide range of *N. gonorrhoeae* strains, growth in the absence of antimicrobials must

71 be consistent and comparable and bacterial growth phases at the time of exposure to  
72 antimicrobial need to be synchronized in early to mid-log phase.

73 In this study, a standardized *in vitro* time-kill curve assay for *N. gonorrhoeae* was developed  
74 using Graver-Wade (GW) medium. GW medium is a chemically defined, nutritious, liquid  
75 medium that supports growth of a wide range of *N. gonorrhoeae* auxotypes and clinical isolates  
76 starting from very low inocula (8). The novel time-kill curve assay was validated on five World  
77 Health Organization *N. gonorrhoeae* reference strains with fluoroquinolone resistance  
78 determinants. A highly susceptible *N. gonorrhoeae* isolate (DOGK18, 1964, Denmark) was  
79 subsequently studied in detail and time-kill curve analysis performed for nine antimicrobials  
80 that have been or currently are used to treat gonorrhoea. In a second step, we obtained the  
81 pharmacodynamic functions for each antimicrobial from the *in vitro* time-kill data and studied  
82 their pharmacodynamic properties against *N. gonorrhoeae*.

83

## 84 MATERIALS AND METHODS

85 ***Neisseria gonorrhoeae* isolates and media.** The five international *N. gonorrhoeae* reference  
86 strains WHO G, WHO K, WHO L, WHO M, and WHO N with different ciprofloxacin  
87 conferring mutations in *gyrA*, *parC* and *parE* (9) and a clinical antimicrobial susceptible ‘wild-  
88 type’ isolate cultured in 1964 in Denmark (DOGK18), were studied. Isolates were cultured,  
89 from frozen stocks (-70°C), on GCAGP agar plates (3.6% Difco GC Medium Base agar [BD,  
90 Diagnostics, Sparks, MD, USA] supplemented with 1% haemoglobin [BD, Diagnostics], 1%  
91 IsoVitalex [BD, Diagnostics] and 10% horse serum) for 18-20 hours at 37°C in a humid 5%  
92 CO<sub>2</sub>-enriched atmosphere. Gonococcal colonies were subcultured once more on GCAGP agar  
93 for 18-20 hours at 37°C in a humid 5% CO<sub>2</sub>-enriched atmosphere, before being transferred to  
94 the liquid sterile GW medium, prepared as earlier described (4), for growth curve and time-kill  
95 experiments.

96       **Viable cell counts.** Bacterial viability was measured using a modified Miles and Misra  
97 method as previously described (10). Growing bacteria were removed from 96-well plates at  
98 specified time points using a multichannel pipette and diluted in sterile phosphate buffered  
99 saline (PBS) in six subsequent 1:10 dilutions (20  $\mu$ l culture in 180  $\mu$ l diluent). Ten  $\mu$ l droplets  
100 of each dilution were spotted on GCRAP (3.6% Difco GC Medium Base agar [BD,  
101 Diagnostics] supplemented with 1% hemoglobin [BD, Diagnostics] and 1% IsoVitalex [BD,  
102 Diagnostics]). GCRAP plates were dried with open lid in a sterile environment for 30-60  
103 minutes prior to their usage. After drying the droplets (approximately 5-10 minutes), plates  
104 were incubated for 24 hours at 37°C in a humid 5% CO<sub>2</sub>-enriched atmosphere. For every  
105 concentration and time point, colonies were counted for the first dilution that resulted in a  
106 countable range of 3-30 colonies and the CFU/ml calculated.

107       **Growth curves.** Prior to growth curve experiments strains were subcultured on Chocolate  
108 agar PolyViteX (Biomérieux). A 0.5 McFarland inoculum was prepared and diluted to 100  
109 CFU/ml (1:10<sup>6</sup>) in GW Medium (35°C). A volume of 100  $\mu$ l diluted bacteria per well was  
110 transferred to Sarstedt round bottom 96 well plates. The plates were tightly sealed and bacteria  
111 were grown shaking at 100 rpm at 35°C in a humid 5% CO<sub>2</sub>-enriched atmosphere. Bacterial  
112 growth was monitored over a time-course of sixty hours (0, 2, 4, 6, 8, 10, 12, 20, 22, 24, 26,  
113 28, 30, 32, 34, 40, 44, 48, 60 hours). For every sampled time point, the content of one well  
114 was removed and viable counts determined (10). Growth curves were analyzed by plotting the  
115 log CFU/ml against the time and fitting a Gompertz growth model to the data as implemented  
116 in the package *cellGrowth* (11, 12). Only lag, log and stationary phases were included in the  
117 analysis and the decline phase excluded.

118       **Time-kill assay.** Time-kill curve analyses were performed by culturing *N. gonorrhoeae* in  
119 GW medium (4), in the presence of eleven antimicrobial-concentrations in doubling dilutions  
120 ranging from 0.016×MIC to 16×MIC. For DOGK18, the MICs were determined prior to the  
121 experiment using Etest (bioMérieux, Marcy l'Etoile, France) according to the manufacturer's

122 instructions. For all other strains, previously published MIC values were used (9). The  
123 antimicrobials examined were ciprofloxacin (Sigma Aldrich, China), gentamicin (Sigma  
124 Aldrich, Israel), spectinomycin (Sigma Aldrich, Israel), azithromycin (Sigma Aldrich, USA),  
125 benzylpenicillin (Sigma Aldrich, USA), ceftriaxone (Sigma Aldrich, Israel), cefixime  
126 (European pharmacopeia reference standard, France), chloramphenicol (Sigma Aldrich,  
127 China) and tetracycline (Sigma Aldrich, China). Growth curves were initially performed to  
128 confirm that all strains would reach a stable early- to mid-log phase after four hours of pre-  
129 incubation in antimicrobial-free GW medium. Subsequently, a 0.5 McFarland inoculum of *N.*  
130 *gonorrhoeae* was prepared in sterile PBS from cultures grown on GCAGP agar plates for 18-  
131 20 hours at 37°C in a humid 5% CO<sub>2</sub>-enriched atmosphere. For each strain, 30 µl of the  
132 inoculum was diluted in 15 ml pre-warmed (37°C) antimicrobial-free GW medium and 90 µl  
133 per well was dispersed in round bottom 96-well Sarstedt microtiter plates. The plates were  
134 pre-incubated for 4 h shaking at 150 rpm, 35°C in a humid 5% CO<sub>2</sub>-enriched atmosphere. To  
135 each well containing 90 µl of pre-incubated bacteria, 10 µl of one of the antimicrobial  
136 concentrations (or PBS) was added, resulting in eight identical rows (one row for each time-  
137 point) containing bacteria exposed to eleven different antimicrobial concentrations and one  
138 untreated control.

139 **Estimating bacterial growth rates.** The bacterial net growth rates ( $\psi$ ) were determined  
140 from changes in the density of viable bacteria (CFU/ml) during the first six hours of the time-  
141 kill experiments. The bacterial populations were assumed to grow or die at a constant rate,  
142 resulting in an exponential increase or decrease in bacterial density:

$$143 \quad N(t) = N_0 \times e^{\psi t}.$$

144 The net growth rate was estimated as the coefficient of a linear regression from the logarithm  
145 of the colony counts. Maximum likelihood estimation was used to account for the censored data  
146 (values below the limit of detection of 100 CFU/ml). The geometric mean of all measurements

147 at zero hours for a given antimicrobial as the first data point, was used. From the growth rate,  
148 the bacterial doubling time can be calculated as follows:

$$149 \quad T_{1/2} = \frac{\ln(2)}{\psi}.$$

150

151 **Pharmacodynamic function.** A pharmacodynamic function (Fig. 1) describes the  
152 relationship between bacterial net growth rates ( $\psi$ ) and the concentration of an antimicrobial  
153 ( $a$ ) (4):

$$154 \quad \psi(a) = \psi_{\max} - \frac{(\psi_{\max} - \psi_{\min}) \left(\frac{a}{z\text{MIC}}\right)^{\kappa}}{\left(\frac{a}{z\text{MIC}}\right)^{\kappa} - \frac{\psi_{\min}}{\psi_{\max}}},$$

155 where  $\psi_{\max}$  is to the maximal bacterial growth rate in the absence of antimicrobial and  $\psi_{\min}$  is  
156 the minimal bacterial net growth rate at high concentrations of antimicrobial.  $z\text{MIC}$  is the  
157 pharmacodynamic MIC where the bacterial growth rate is zero ( $\psi(z\text{MIC}) = 0$ ).  $\kappa$  denotes the  
158 Hill coefficient, which describes the steepness of the sigmoid relationship between bacterial  
159 growth and antimicrobial concentration. For each antimicrobial, four parameters of the  
160 pharmacodynamic function were estimated using a self-starter function, implemented in the  
161 package *drc* (13) for the R software environment for statistical computing (14). All figures can  
162 be reproduced with R code and data from the following GitHub repository:  
163 <https://github.com/sunnivas/PDfunction>.

164

## 165 **RESULTS**

166 **Growth of *N. gonorrhoeae*.** Growth curves for the five different WHO *N. gonorrhoeae*  
167 reference strains (Fig. S1 supplemental material) confirmed that growth was well supported in  
168 GW medium. All strains could be grown from a starting inoculum of less than  $10^3$  CFU/ml and  
169 had a lag phase of less than five hours. The stationary phase lasted until 36 hours for all strains,

170 followed by a steep declination phase. Growth was similar for all strains with WHO L the only  
171 strain that had a slightly slower growth.

172 **Time-kill curves.** Time-kill curves for ciprofloxacin using the WHO reference strains WHO  
173 G (MIC = 0.125  $\mu\text{g/ml}$ ), WHO K (MIC > 32  $\mu\text{g/ml}$ ), WHO L (MIC > 32  $\mu\text{g/ml}$ ), WHO M  
174 (MIC = 2  $\mu\text{g/ml}$ ), WHO N (MIC = 4  $\mu\text{g/ml}$ ) and DOGK18 (MIC = 0.008  $\mu\text{g/ml}$ ) are shown in  
175 Fig. 2. Ciprofloxacin induced a bactericidal effect in all six strains, but the onset of the  
176 bactericidal activity depended on the concentration of the antimicrobial and differed between  
177 strains. All strains with the exception of WHO M and WHO N were killed to below the limit  
178 of detection (100 CFU/mL) at the highest antimicrobial concentration (16 $\times$ MIC). The  
179 susceptible DOGK18 strain experienced the most rapid killing during the first hour at high  
180 antimicrobial concentrations. For WHO G and WHO M, the bactericidal activity decreased  
181 during the six hours of the assay.

182 Time-kill curves for eight antimicrobials were made (spectinomycin, gentamicin,  
183 azithromycin, benzylpenicillin, ciprofloxacin, ceftriaxone, cefixime, chloramphenicol and  
184 tetracycline) using the highly antimicrobial susceptible DOGK18 strain (Fig. 3). Similar to the  
185 effect of ciprofloxacin (Fig. 2F), gentamicin and spectinomycin exhibited rapid killing during  
186 the first two hours of the assay for concentrations above MIC. Cefixime and ceftriaxone showed  
187 little effect from 0 hours to 3 hours, however, after that growth rate decreased rapidly. For  
188 benzylpenicillin and azithromycin, at concentrations above MIC, the killing started after one  
189 hour and decreased rapidly at later time points. The time-kill curves for tetracycline and  
190 chloramphenicol looked similar with almost no killing of bacteria within the assay time of four  
191 hours. Chloramphenicol showed a weak bactericidal effect at the highest antimicrobial  
192 concentration (Fig. 3).

193 **Pharmacodynamic functions.** The bacterial net growth rates were estimated from the time-  
194 kill curves by fitting a linear regression to the logarithm of the colony counts (Fig. 4A). The  
195 pharmacodynamic function was then fitted to the estimated growth rates at different



196 antimicrobial concentrations (Fig. 4B, solid line). Generally, the estimated net growth rates at  
197 high antimicrobial concentrations reached a lower asymptote ( $\psi_{\min}$ ). In some cases, an  
198 additional drop was observed in the estimated growth rates at very high antimicrobial  
199 concentrations (Fig. 4B, dashed line). This phenomenon occurred at antimicrobial  
200 concentrations that are likely to be toxic, so those data points were removed before estimating  
201 the parameters of the pharmacodynamic function.

202 The pharmacodynamic functions for the six strains provided information on ciprofloxacin  
203 resistance mechanisms (Fig. 4C and Table S3 in the supplemental material). The DOGK18  
204 strain had a low pharmacodynamic MIC (zMIC) and a low net bacterial growth rate at high  
205 antimicrobial concentrations ( $\psi_{\min}$ ), indicating the strong bactericidal effect of ciprofloxacin.  
206 The five WHO reference strains showed that the ciprofloxacin resistance determinants not only  
207 shifted the zMIC but also resulted in less killing at antimicrobial concentrations above the zMIC  
208 (higher  $\psi_{\min}$  compared to DOGK18 strain).

209 The pharmacodynamic functions for the nine antimicrobials in the DOGK18 strain  
210 illustrated the different effects that antimicrobials induce on gonococcal growth of *N.*  
211 *gonorrhoeae* (Fig. 4D and Table 1). The average of the maximal growth rate in the absence of  
212 antimicrobials over all experiments was  $\psi_{\max} = 0.77 \text{ h}^{-1}$  (95% confidence interval [CI]: 0.71-  
213  $0.84 \text{ h}^{-1}$ ). This corresponds to a bacterial doubling time of  $T_{1/2} = 54 \text{ min}$  (95% CI: 49-59 min).  
214 Ciprofloxacin, spectinomycin and gentamicin induced the strongest bactericidal effect with  $\psi_{\min}$   
215  $< -5 \text{ h}^{-1}$ . Chloramphenicol and tetracycline exhibited almost no killing within the six hours of  
216 the assay ( $\psi_{\min} > -0.2 \text{ h}^{-1}$ ). The Hill coefficient  $\kappa$  ranged between 1.0 and 2.5. All four parameters  
217 of the pharmacodynamic function were very similar for ceftriaxone, cefixime and the  
218 bacteriostatic compounds chloramphenicol and tetracycline. Generally, the estimated zMIC  
219 was in good agreement with the MIC measured by Etest but there were substantial deviations  
220 for benzylpenicillin and cefixime.

221

## 222 **DISCUSSION**

223 A robust and reliable method to appropriately evaluate antimicrobial treatment options *in vitro*  
224 is one of the tools that is urgently needed to support tackling the problem of antimicrobial  
225 resistant *N. gonorrhoeae*. In this study, a standardized *in vitro* time-kill curve assay was  
226 developed and the resulting data were used to study pharmacodynamics parameters describing  
227 the relationship between the concentration of antimicrobials and the bacterial net growth rate.  
228 Our study applied the concept of pharmacodynamic functions (4) to *N. gonorrhoeae* for the  
229 first time. To our knowledge, this is also the first study to obtain and compare the  
230 pharmacodynamic functions of an antimicrobial in susceptible and resistant strains of the same  
231 pathogen species, opening up avenues into phenotypically understanding the effects of different  
232 resistance determinants.

233 The developed time-kill assay worked well for different *N. gonorrhoeae* strains, including  
234 highly resistant isolates. Growing the bacteria in microwell plates provided a high throughput  
235 and made it possible to study a wider range of antimicrobial concentrations in the same  
236 experiment. Growth curves confirmed reproducible growth in absence of antimicrobials, WHO  
237 L had a prolonged lag phase and grew slightly slower than the other strains. Therefore in the  
238 time-kill assays bacteria were grown for four hours before adding the antimicrobial. The assay  
239 time was limited to six hours and growth in absence of antimicrobials highly consistent and  
240 exponential for all strains. The five WHO reference strains tested have different combinations  
241 of ciprofloxacin resistance-conferring mutations in *gyrA*, *parC* and *parE*. These mutations  
242 resulted in a shift of the pharmacodynamic MIC (zMIC) and reduced the antimicrobial killing  
243 at the same time, showing that even high doses of ciprofloxacin had a limited effect on the  
244 growth of these strains. The analysis of time-kill data with a pharmacodynamic function  
245 confirmed the strong bactericidal effects of ciprofloxacin, gentamicin and spectinomycin.  
246 Ciprofloxacin is a prime example of a bactericidal antimicrobial, representing the class of  
247 topoisomerase II inhibiting fluoroquinolones (15). Spectinomycin inhibits protein translation

248 through blocking of tRNA translocation, whereas gentamicin induces translational misreading  
249 (16–18). While spectinomycin is a well-recognised treatment option for gonorrhoea and its  
250 bactericidal action has been described previously (19, 20), gentamicin is only recommended  
251 first-line treatment for gonorrhoea in Malawi, where it is used together with doxycycline in the  
252 syndromic management algorithm for urethritis (21). However, gentamicin has been suggested  
253 for wider use in the treatment of gonorrhoea (22–24). The cell wall inhibiting  $\beta$ -lactam  
254 antimicrobials are known to have a time-dependent mode of action (25, 26). Therefore it was  
255 not surprising that benzylpenicillin, ceftriaxone and cefixime were characterized by slower  
256 killing ( $-1.6 \text{ h}^{-1} < \psi_{\min} < 0.6 \text{ h}^{-1}$ ). Although currently not used for treatment of *N. gonorrhoeae*,  
257 chloramphenicol and tetracycline often act as model compounds for bacteriostatic effects (27,  
258 28). These effects were confirmed by the estimates of the net bacterial growth rate at high  
259 antimicrobial concentrations that were close to zero.

260 Regoes et al. (4) hypothesized that the Hill coefficient of the pharmacodynamic function ( $\kappa$ )  
261 reflects the time and concentration dependency of antimicrobials. For example, ciprofloxacin  
262 is thought to act in a concentration-dependent manner and a high value of  $\kappa$  would require the  
263 antimicrobial concentrations to be at or above the zMIC. Tetracycline was considered a time-  
264 dependent antimicrobial which could be characterized by lower values of  $\kappa$ . Our estimate for  
265 tetracycline was not significantly different from that of the bactericidal ciprofloxacin and was  
266 not as low as reported for *E. coli* (4). These discrepancies could reflect differences in time and  
267 concentration dependency of antimicrobials in *N. gonorrhoeae* and *E. coli*, different  
268 concentration ranges studied (up to 100x MIC) or could be simply due to the properties of the  
269 specific strain Regoes et al. (4) studied.

270 There are some limitations of the methods used in the present study. First, the rapid  
271 bactericidal effects of some antimicrobials occurred minutes after the compound was added  
272 resulting in bacterial counts below limit of detection at the first time point. These effects can  
273 make it challenging to estimate the minimal bacterial net growth rate at high concentrations of

274 antimicrobials ( $\psi_{\min}$ ), as observed for gentamicin for example. Second, exceedingly high  
275 antimicrobial concentrations can kill *N. gonorrhoeae* almost instantaneously. This might  
276 explain the observed outliers that deviated from the pharmacodynamic function (Fig. 4B).  
277 Third, the time-kill curves appeared to level off over time for bactericidal compounds in  
278 susceptible strains. Interestingly, this phenomenon might represent a physiological adaptation  
279 to those antimicrobials, often described as persister cell formation (29–34). This non-  
280 exponential killing makes it difficult to estimate the net growth rate with linear regression. The  
281 clinical relevance of persister cells has been demonstrated for chronic infections such as  
282 tuberculosis, cystic fibrosis and infections caused by *Staphylococcus aureus* (35–36). For *N.*  
283 *gonorrhoeae*, however, this phenomenon has not been previously described. Fourth, the  
284 proposed method allows appropriate evaluation of antimicrobials against *N. gonorrhoeae in*  
285 *vitro* only.

286 The *in vitro* pharmacodynamic parameters can provide relative comparisons across different  
287 strains and antimicrobials which can be extremely valuable in preclinical studies. However,  
288 deriving rational resistance breakpoints for different dosing schedules will have to come from  
289 clinical pharmacokinetic and pharmacodynamic (PK/PD) studies that include parameters such  
290 as serum concentrations and half-life time of the antimicrobial. For benzylpenicillin,  
291 ceftriaxone and cefixime the time of free antimicrobial above the MIC value should be  
292 maximized (37–40), suggesting that multiple dose treatment would be a rational strategy.  
293 However the longer serum half-life of ceftriaxone (41) compared to other  $\beta$ -lactam  
294 antimicrobials suggests that increasing the dose is still efficacious for most *N. gonorrhoeae*  
295 strains. Fluoroquinolones and aminoglycosides, which act in a concentration dependent and  
296 bactericidal manner should be given as a single high dose (42). This is typically achieved  
297 maximizing the AUC/MIC and peak serum concentration/MIC ratio (43-45). Our results  
298 suggest that this could be the case for ciprofloxacin, gentamicin and spectinomycin, which were  
299 found to be strongly bactericidal. Azithromycin has been described to be bacteriostatic in

300 *Staphylococcus aureus*, *Streptococcus pneumoniae* or *Haemophilus influenza* (46) but appears  
301 to act bactericidal on *Pseudomonas aeruginosa* (47). Our in-vitro pharmacodynamics  
302 parameters suggest that a clear classification of azithromycin as bacteriostatic or bactericidal is  
303 not possible for *N. gonorrhoeae*.

304

305 In summary, the present study shows that evaluation of the parameters of a  
306 pharmacodynamic function based on time-kill data can add valuable information beyond that  
307 of MIC values for different antimicrobials. The quantitative assessment of pharmacodynamic  
308 properties provides a more detailed picture about antimicrobial-induced effects on *N.*  
309 *gonorrhoeae*. The developed time-kill curve assay, in combination with the concept of the  
310 pharmacodynamic function, could be used for *in vitro* evaluation of new and existing  
311 antimicrobials and the effects of combining antimicrobials against *N. gonorrhoeae*.

312

### 313 **ACKNOWLEDGEMENTS**

314 The present study was funded through an Interdisciplinary PhD (IPhD) project from  
315 SystemsX.ch (The Swiss Initiative for Systems Biology), RADAR-Go (RAPid Diagnosis of  
316 Antibiotic Resistance in Gonorrhoea; funded by the Swiss Platform for Translational  
317 Medicine), and the Örebro County Council Research Committee and the Foundation for  
318 Medical Research at Örebro University Hospital, Sweden.

319

### 320 **REFERENCES**

- 321 1. **Unemo M, Shafer WM.** 2014. Antimicrobial resistance in *Neisseria gonorrhoeae* in the  
322 21st Century: past, evolution, and future. *Clin Microbiol Rev* **27**:587–613.

- 323 2. **Mueller M, de la Peña A, Derendorf H.** 2004. Issues in pharmacokinetics and  
324 pharmacodynamics of anti-infective agents: kill curves versus MIC. *Antimicrob Agents*  
325 *Chemother* **48**:369–377.
- 326 3. **Li DRC, Zhu M, Schentag JJ.** 2012. Achieving an optimal outcome in the treatment of  
327 infections. *Clin Pharmacokinet* **37**:1–16.
- 328 4. **Regoes RR, Wiuff C, Zappala RM, Garner KN, Baquero F, Levin BR.** 2004.  
329 Pharmacodynamic functions: a multiparameter approach to the design of antibiotic  
330 treatment regimens. *Antimicrob Agents Chemother* **48**:3670–3676.
- 331 5. **Takei M, Yamaguchi Y, Fukuda H, Yasuda M, Deguchi T.** 2005. Cultivation of  
332 *Neisseria gonorrhoeae* in liquid media and determination of its in vitro susceptibilities to  
333 quinolones. *J Clin Microbiol* **43**:4321–4327.
- 334 6. **Jeverica S, Golparian D, Hanzelka B, Fowlie AJ, Matičič M, Unemo M.** 2014. High in  
335 vitro activity of a novel dual bacterial topoisomerase inhibitor of the ATPase activities of  
336 GyrB and ParE (VT12-008911) against *Neisseria gonorrhoeae* isolates with various high-  
337 level antimicrobial resistance and multidrug resistance. *J Antimicrob Chemother*  
338 **69**:1866–1872.
- 339 7. **Hamilton-Miller JM, Bruzzese T, Nonis A, Shah S.** 1996. Comparative anti-gonococcal  
340 activity of S-565, a new rifamycin. *Int J Antimicrob Agents* **7**:247–250.
- 341 8. **Wade JJ, Graver MA.** 2007. A fully defined, clear and protein-free liquid medium  
342 permitting dense growth of *Neisseria gonorrhoeae* from very low inocula. *FEMS*  
343 *Microbiol Lett* **273**:35–7.
- 344 9. **Unemo M, Fasth O, Fredlund H, Linnios A, Tapsall J.** 2009. Phenotypic and genetic  
345 characterization of the 2008 WHO *Neisseria gonorrhoeae* reference strain panel intended

- 346 for global quality assurance and quality control of gonococcal antimicrobial resistance  
347 surveillance for public health purposes. *J Antimicrob Chemother* **63**:1142–1151.
- 348 10. **Chen CY, Nace GW, Irwin PL.** 2003. A 6 x 6 drop plate method for simultaneous  
349 colony counting and MPN enumeration of *Campylobacter jejuni*, *Listeria monocytogenes*,  
350 and *Escherichia coli*. *J Microbiol Methods* **55**:475–479.
- 351 11. **Gagneur J, Neudecker A.** 2012. cellGrowth: Fitting cell population growth models. R  
352 package version 1.12.0. **Available online:**  
353 [http://www.bioconductor.org/packages/release/bioc/manuals/cellGrowth/man/cellGrowth.](http://www.bioconductor.org/packages/release/bioc/manuals/cellGrowth/man/cellGrowth.pdf)  
354 pdf
- 355 12. **Zwietering MH, Jongenburger I, Rombouts FM, van 't Riet K.** 1990. Modeling of the  
356 bacterial growth curve. *Appl Environ Microbiol* **56**:1875–1881.
- 357 13. **Ritz C, Streibig JC.** 2005. Bioassay analysis using R. *Stat. Softw.* 12, (2005). Available  
358 online: <http://www.jstatsoft.org/v12/i05/paper>
- 359 14. **R Core Team.** 2014. R: A language and environment for statistical computing. R  
360 foundation for statistical computing, Vienna, Austria. **Available online:** [https://www.r-](https://www.r-project.org/)  
361 [project.org/](https://www.r-project.org/)
- 362 15. **LeBel M.** 1988. Ciprofloxacin: chemistry, mechanism of action, resistance, antimicrobial  
363 spectrum, pharmacokinetics, clinical trials, and adverse reactions. *Pharmacotherapy* **8**:3–  
364 33.
- 365 16. **Borovinskaya MA, Pai RD, Zhang W, Schuwirth BS, Holton JM, Hirokawa G, Kaji**  
366 **H, Kaji A, Cate JHD.** 2007. Structural basis for aminoglycoside inhibition of bacterial  
367 ribosome recycling. *Nat Struct Mol Biol* **14**:727–732.

- 368 17. **Borovinskaya MA, Shoji S, Holton JM, Fredrick K, Cate JHD.** 2007. A steric block in  
369 translation caused by the antibiotic spectinomycin. *ACS Chem Biol* **2**:545–552.
- 370 18. **Wilson DN.** 2009. The A–Z of bacterial translation inhibitors. *Crit Rev Biochem Mol*  
371 *Biol* **44**:393–433.
- 372 19. **Ward ME.** 1977. The bactericidal action of spectinomycin on *Neisseria gonorrhoeae*. *J*  
373 *Antimicrob Chemother* **3**:323–329.
- 374 20. **Iina EN, Malakhova MV, Bodoev IN, Oparina NY, Filimonova AV, Govorun VM.**  
375 2013. Mutation in ribosomal protein S5 leads to spectinomycin resistance in *Neisseria*  
376 *gonorrhoeae*. *Front Microbiol* **4**:186.
- 377 21. **Brown LB, Krysiak R, Kamanga G, Mapanje C, Kanyamula H, Banda B, Mhango**  
378 **C, Hoffman M, Kamwendo D, Hobbs M, Hosseinipour MC, Martinson F, Cohen**  
379 **MS, Hoffman IF.** 2010. *Neisseria gonorrhoeae* antimicrobial susceptibility in Lilongwe,  
380 Malawi, 2007. *Sex Transm Dis* **37**:169–172.
- 381 22. **Ross JDC, Lewis DA.** 2012. Cephalosporin resistant *Neisseria gonorrhoeae*: time to  
382 consider gentamicin? *Sex Transm Infect* **88**:6–8.
- 383 23. **Dowell D, Kirkcaldy RD.** 2012. Effectiveness of gentamicin for gonorrhoea treatment:  
384 systematic review and meta-analysis. *Sex Transm Infect* **88**:589–594.
- 385 24. **Hathorn E, Dhasmana D, Duley L, Ross JD.** 2014. The effectiveness of gentamicin in  
386 the treatment of *Neisseria gonorrhoeae*: a systematic review. *Syst Rev* **3**:104.
- 387 25. **Williamson R, Tomasz A.** 1985. Inhibition of cell wall synthesis and acylation of the  
388 penicillin binding proteins during prolonged exposure of growing *Streptococcus*  
389 *pneumoniae* to benzylpenicillin. *Eur J Biochem FEBS* **151**:475–483.



- 390 26. **Drusano GL**. 2004. Antimicrobial pharmacodynamics: critical interactions of “bug and  
391 drug.” *Nat Rev Microbiol* **2**:289–300.
- 392 27. **Comby S, Flandrois JP, Carret G, Pichat C**. 1989. Mathematical modelling of growth  
393 of *Escherichia coli* at subinhibitory levels of chloramphenicol or tetracyclines. *Res*  
394 *Microbiol* **140**:243–254.
- 395 28. **Greulich P, Scott M, Evans MR, Allen RJ**. 2015. Growth-dependent bacterial  
396 susceptibility to ribosome-targeting antibiotics. *Mol Syst Biol* **11**(1):796.
- 397 29. **Balaban NQ, Merrin J, Chait R, Kowalik L, Leibler S**. 2004. Bacterial persistence as a  
398 phenotypic switch. *Science* **305**:1622–1625.
- 399 30. **Dörr T, Vulić M, Lewis K**. 2010. Ciprofloxacin causes persister formation by inducing  
400 the TisB toxin in *Escherichia coli*. *PLoS Biol* **8**:e1000317.
- 401 31. **Feng J, Kessler DA, Ben-Jacob E, Levine H**. 2014. Growth feedback as a basis for  
402 persister bistability. *Proc Natl Acad Sci USA* **111**:544–549.
- 403 32. **Maisonneuve E, Gerdes K**. 2014. Molecular mechanisms underlying bacterial persisters.  
404 *Cell* **157**:539–548.
- 405 33. **Lewis K**. 2007. Persister cells, dormancy and infectious disease. *Nat Rev Microbiol* **5**:48–  
406 56.
- 407 34. **Kint CI, Verstraeten N, Fauvart M, Michiels J**. 2012. New-found fundamentals of  
408 bacterial persistence. *Trends Microbiol* **20**:577–585.
- 409 35. **Fauvart M, De Grootte VN, Michiels J**. 2011. Role of persister cells in chronic  
410 infections: clinical relevance and perspectives on anti-persister therapies. *J Med Microbiol*  
411 **60**:699–709.

- 412 36. **Conlon BP.** 2014. *Staphylococcus aureus* chronic and relapsing infections: Evidence of a  
413 role for persister cells: An investigation of persister cells, their formation and their role in  
414 *S. aureus* disease. *BioEssays News Rev Mol Cell Dev Biol* **36**:991–996.
- 415 37. **Jaffe HW, Schroeter AL, Reynolds GH, Zaidi AA, Martin JE, Thayer JD.** 1979.  
416 Pharmacokinetic determinants of penicillin cure of gonococcal urethritis. *Antimicrob*  
417 *Agents Chemother* **15**:587–591.
- 418 38. **Deguchi T, Yasuda M, Yokoi S, Ishida K-I, Ito M, Ishihara S, Minamidate K,**  
419 **Harada Y, Tei K, Kojima K, Tamaki M, Maeda S-I.** 2003. Treatment of  
420 uncomplicated gonococcal urethritis by double-dosing of 200 mg cefixime at a 6-h  
421 interval. *J Infect Chemother Off J Jpn Soc Chemother* **9**:35–39.
- 422 39. **Chisholm SA, Mouton JW, Lewis DA, Nichols T, Ison CA, Livermore DM.** 2010.  
423 Cephalosporin MIC creep among gonococci: time for a pharmacodynamic rethink? *J*  
424 *Antimicrob Chemother* **65**:2141–8.
- 425 40. **Faulkner RD, Bohaychuk W, Lanc RA, Haynes JD, Desjardins RE, Yacobi A, Silber**  
426 **BM.** 1988. Pharmacokinetics of cefixime in the young and elderly. *J Antimicrob*  
427 *Chemother* **21**:787–794.
- 428 41. **Meyers BR, Srulevitch ES, Jacobson J, Hirschman SZ.** 1983. Crossover study of the  
429 pharmacokinetics of ceftriaxone administered intravenously or intramuscularly to healthy  
430 volunteers. *Antimicrob Agents Chemother* **24**:812–814.
- 431 42. **Drusano GL.** 2007. Pharmacokinetics and pharmacodynamics of antimicrobials. *Clin*  
432 *Infect Dis Off Publ Infect Dis Soc Am* **45 Suppl 1**:S89–95.
- 433

- 434 43. **Levison ME, Levison JH. 2009.** Pharmacokinetics and pharmacodynamics of  
435 antibacterial agents. *Infect Dis Clin North Am* **23**:791–815, vii.
- 436 44. **Craig WA. 1998.** Pharmacokinetic/pharmacodynamic parameters: rationale for  
437 antibacterial dosing of mice and men. *Clin Infect Dis Off Publ Infect Dis Soc Am* **26**:1–  
438 10; quiz 11–12.
- 439 45. **Frimodt-Møller N. 2002.** How predictive is PK/PD for antibacterial agents? *Int J*  
440 *Antimicrob Agents* **19**:333–339.
- 441 46. **Dorfman MS, Wagner RS, Jamison T, Bell B, Stroman DW. 2008.** The  
442 pharmacodynamic properties of azithromycin in a kinetics-of-kill model and implications  
443 for bacterial conjunctivitis treatment. *Adv Ther* **25**:208–217.
- 444 47. **Imamura Y, Higashiyama Y, Tomono K, Izumikawa K, Yanagihara K, Ohno H,**  
445 **Miyazaki Y, Hirakata Y, Mizuta Y, Kadota J, Iglewski BH, Kohno S. 2005.**  
446 Azithromycin Exhibits Bactericidal Effects on *Pseudomonas aeruginosa* through  
447 Interaction with the Outer Membrane. *Antimicrob Agents Chemother* **49**:1377–1380.
- 448
- 449
- 450
- 451
- 452
- 453
- 454

455

456 TABLE 1 Parameter estimates of the pharmacodynamic function for nine antimicrobials in  
457 the antimicrobial susceptible *Neisseria gonorrhoeae* strain DOGK18.

| Antimicrobial    | Antimicrobial class | $\kappa^a$ | $\psi_{\min} (\text{h}^{-1})^a$ | $\psi_{\max} (\text{h}^{-1})^a$ | zMIC ( $\mu\text{g/ml}$ ) <sup>a</sup> | MIC ( $\mu\text{g/ml}$ ) <sup>b</sup> |
|------------------|---------------------|------------|---------------------------------|---------------------------------|----------------------------------------|---------------------------------------|
| Ciprofloxacin    | Fluoroquinolone     | 1.1±0.1    | -8.9±2.2                        | 0.7±0.4                         | 0.002±0.0001                           | <0.004                                |
| Gentamicin       | Aminoglycoside      | 2.0±0.3    | -107.4±140.6                    | 0.9±0.07                        | 0.2±0.04                               | 1                                     |
| Spectinomycin    | Aminocyclitol       | 1.0±0.6    | -9.6±1                          | 0.7±0.03                        | 5±0.7                                  | 4                                     |
| Azithromycin     | Macrolide           | 2.5±0.2    | -2.2±0.1                        | 0.6±0.05                        | 0.3±0.03                               | 0.19                                  |
| Benzylpenicillin | $\beta$ -lactam     | 1.1±0.1    | -1.6±0.6                        | 0.9±0.2                         | 0.004±0.002                            | 0.032                                 |
| Ceftriaxone      | $\beta$ -lactam     | 1.6±0.1    | -0.6±0.2                        | 0.8±0.07                        | 0.0003±0.0001                          | <0.002                                |
| Cefixime         | $\beta$ -lactam     | 1.7±0.5    | -0.8±0.2                        | 0.8±0.1                         | 0.0002±0.0002                          | 0.016                                 |
| Chloramphenicol  | Chloramphenicol     | 1.8±0.4    | -0.1±0.01                       | 0.7±0.2                         | 0.5±0.1                                | 0.19                                  |
| Tetracycline     | Tetracycline        | 1.0±0.2    | -0.2±0.08                       | 0.8±0.07                        | 0.5±0.3                                | 0.125                                 |

458 <sup>a</sup>Estimates are given as arithmetic means and standard deviations from two independent experiments. Parameter estimates for each  
459 individual experiment are given in Table S2 of the supplemental material.

460 <sup>b</sup>MIC values measured with Etest in accordance with the manufacturer's instructions.

461

## 462 Figure legends

463 FIG 1 The pharmacodynamics function and four parameters is shown as described in (4). The  
464 bacterial growth rates ( $\psi$ ) in response to each antimicrobial concentration are estimated from  
465 time-kill data with linear regression. The maximal bacterial growth rate  $\psi_{\max}$ , the minimal  
466 bacterial net growth rate at high concentrations of antimicrobial  $\psi_{\min}$ , the pharmacodynamic  
467 MIC (zMIC) and the Hill coefficient  $\kappa$  are shown and define the shape of the curve.

468

469 FIG 2 Time-kill curves for ciprofloxacin and six different *Neisseria gonorrhoeae* strains:

470 WHO G (A), WHO K (B), WHO L (C), WHO M (D), WHO N (E) and DOGK18 (F).

471 Controls without antimicrobials are shown in red. Twelve doubling dilutions are plotted, the

472 highest concentration (black line) corresponds to 16× MIC as measured with Etest. The limit  
473 of detection in the assay was 100 CFU/ml. Antimicrobial was added at time 0 h.

474

475 FIG 3 Time-kill curves for the *Neisseria gonorrhoeae* DOGK18 strain using eight different  
476 antimicrobials: gentamicin (A), spectinomycin (B), azithromycin (C), benzylpenicillin (D),  
477 ceftriaxone (E), cefixime (F), chloramphenicol (G) and tetracycline (H). Twelve doubling  
478 dilutions are plotted, the highest concentration (black line) corresponds to 16× MIC as  
479 measured with Etest. The limit of detection in the assay was 100 CFU/ml. Antimicrobial was  
480 added at time 0 h.

481

482 FIG 4 Pharmacodynamic functions for different antimicrobials and *Neisseria gonorrhoeae*  
483 strains. (A) Estimating growth rates (cefixime in DOGK18). Dashed lines represent linear  
484 regressions of the logarithm of the colony counts at different antimicrobial concentrations.  
485 The coefficient of the linear regression corresponds to the net bacterial growth rate (cefixime  
486 in DOGK18). (B) Fitting the pharmacodynamic function to estimated growth rates. Points  
487 correspond to the estimated net bacterial growth rates at different antimicrobial  
488 concentrations. The solid line shows the model fit after removing outliers at high  
489 antimicrobial concentrations. The dashed line indicates the model fit including all data points.  
490 The growth rate in absence of antimicrobial is shown in red at a concentration that is 10-fold  
491 lower than the lowest concentration. (C) Pharmacodynamics functions for ciprofloxacin in six  
492 *N. gonorrhoeae* strains (Low level resistance (LLR)=WHO G; High level resistance  
493 (HLR)=WHO K, WHO L; Resistance (R)=WHO M, WHO N; and Susceptible (S)=  
494 DOGK18) (D) Pharmacodynamic functions for nine different antimicrobials in DOGK18  
495 strain. Each curve is based on the arithmetic mean of the estimated parameters from two  
496 independent time-kill experiments (as in Table 1).

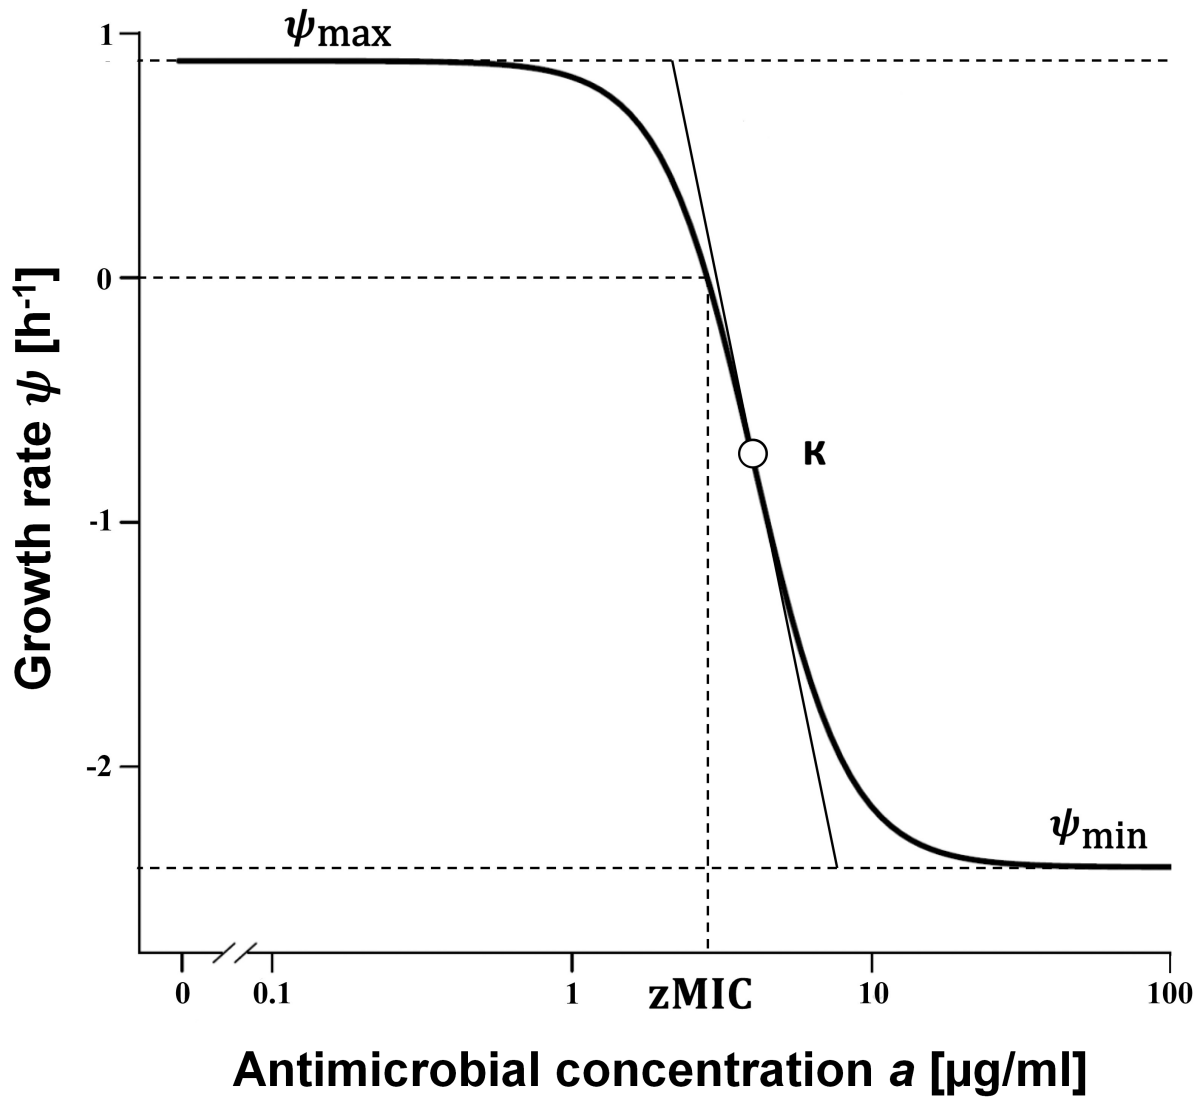

FIG 1 The pharmacodynamics function and four parameters is shown as described in (4). The bacterial growth rates ( $\psi$ ) in response to each antimicrobial concentration are estimated from time-kill data with linear regression. The maximal bacterial growth rate  $\psi_{\text{max}}$ , the minimal bacterial net growth rate at high concentrations of antimicrobial  $\psi_{\text{min}}$ , the pharmacodynamic MIC ( $z\text{MIC}$ ) and the Hill coefficient  $\kappa$  are shown and define the shape of the curve.

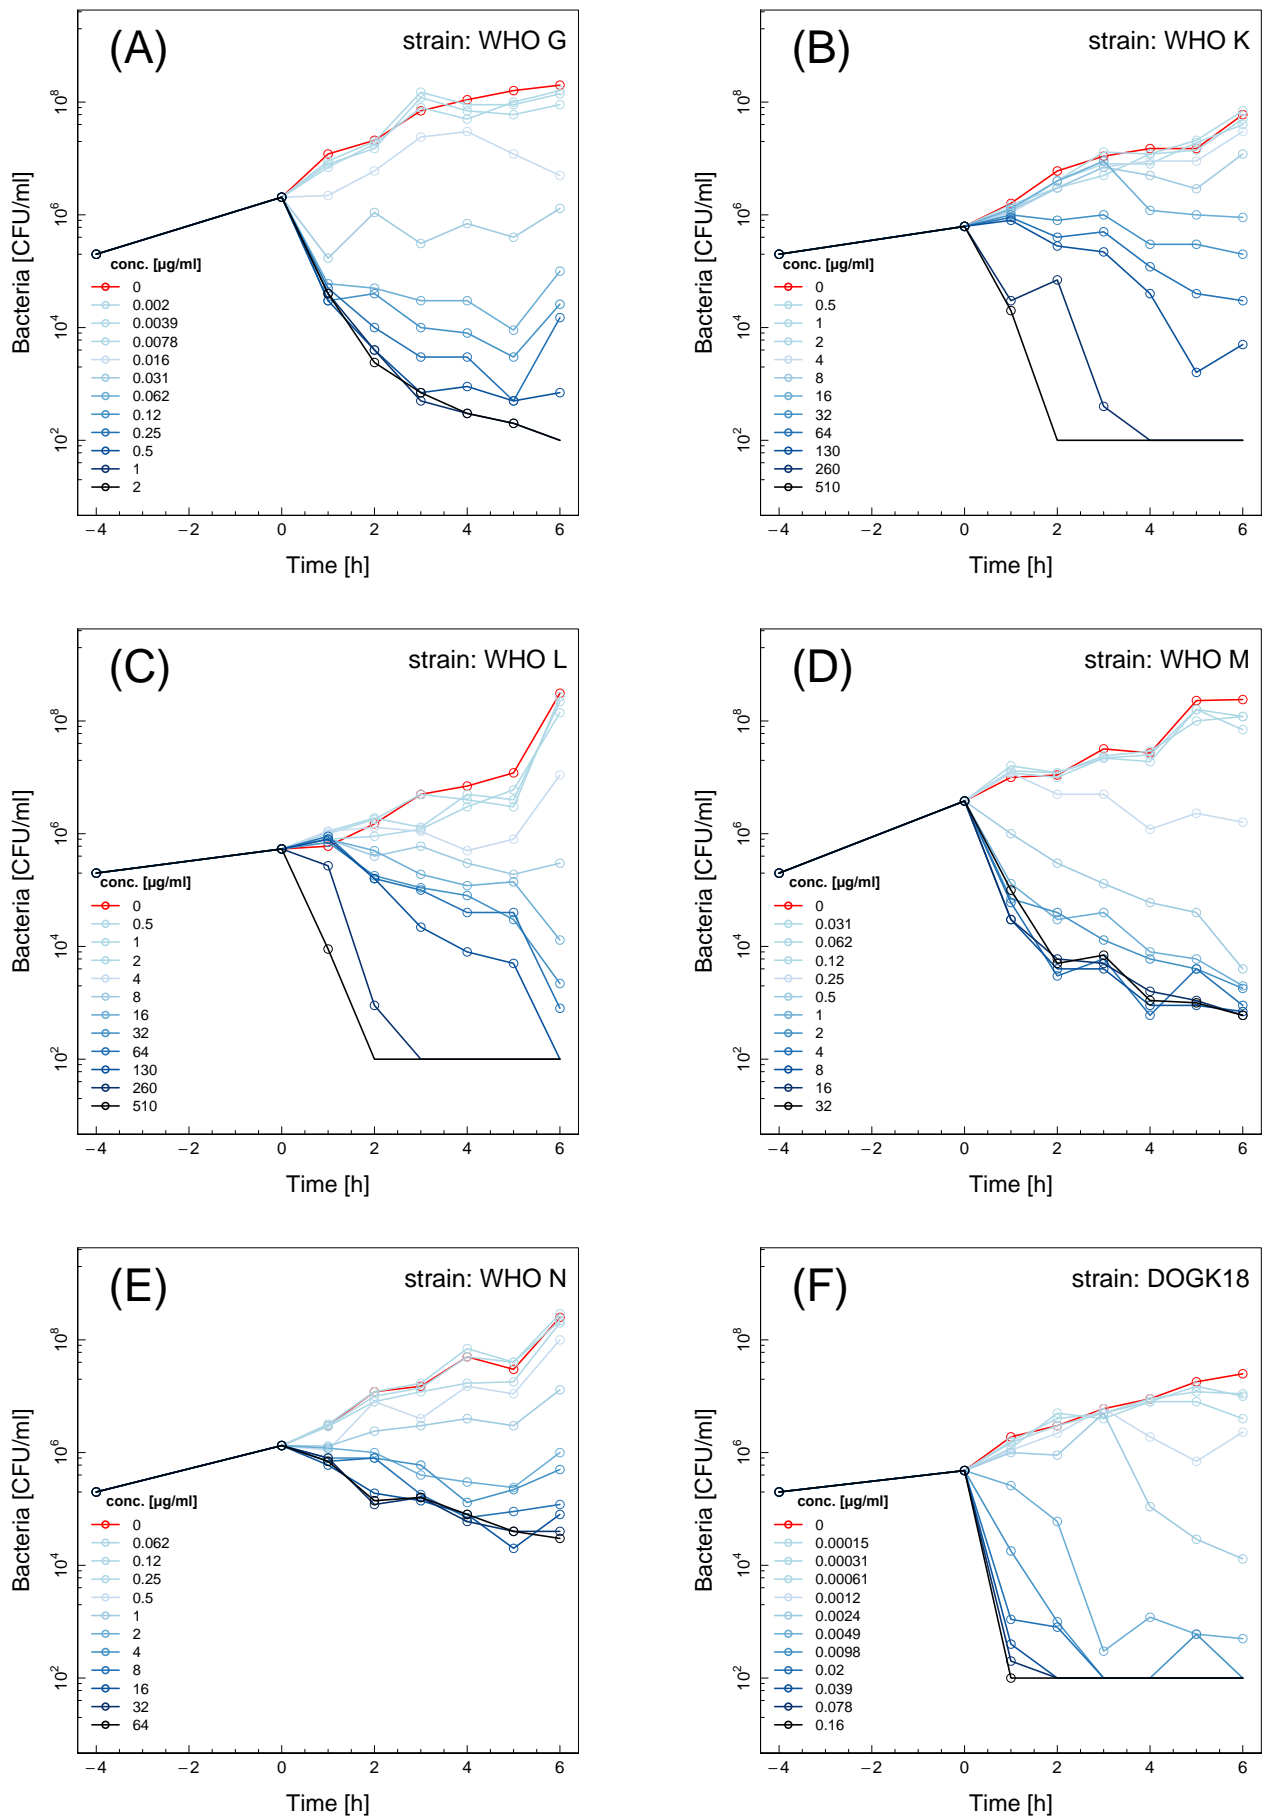

FIG 2 Time-kill curves for ciprofloxacin and six different *Neisseria gonorrhoeae* strains: WHO G (A), WHO K (B), WHO L (C), WHO M (D), WHO N (E) and DOGK18 (F). Controls without antimicrobials are shown in red. Twelve doubling dilutions are plotted, the highest concentration (black line) corresponds to 16 MIC as measured with Etest. The limit of detection in the assay was 100 CFU/ml. Antimicrobial was added at time 0 h.

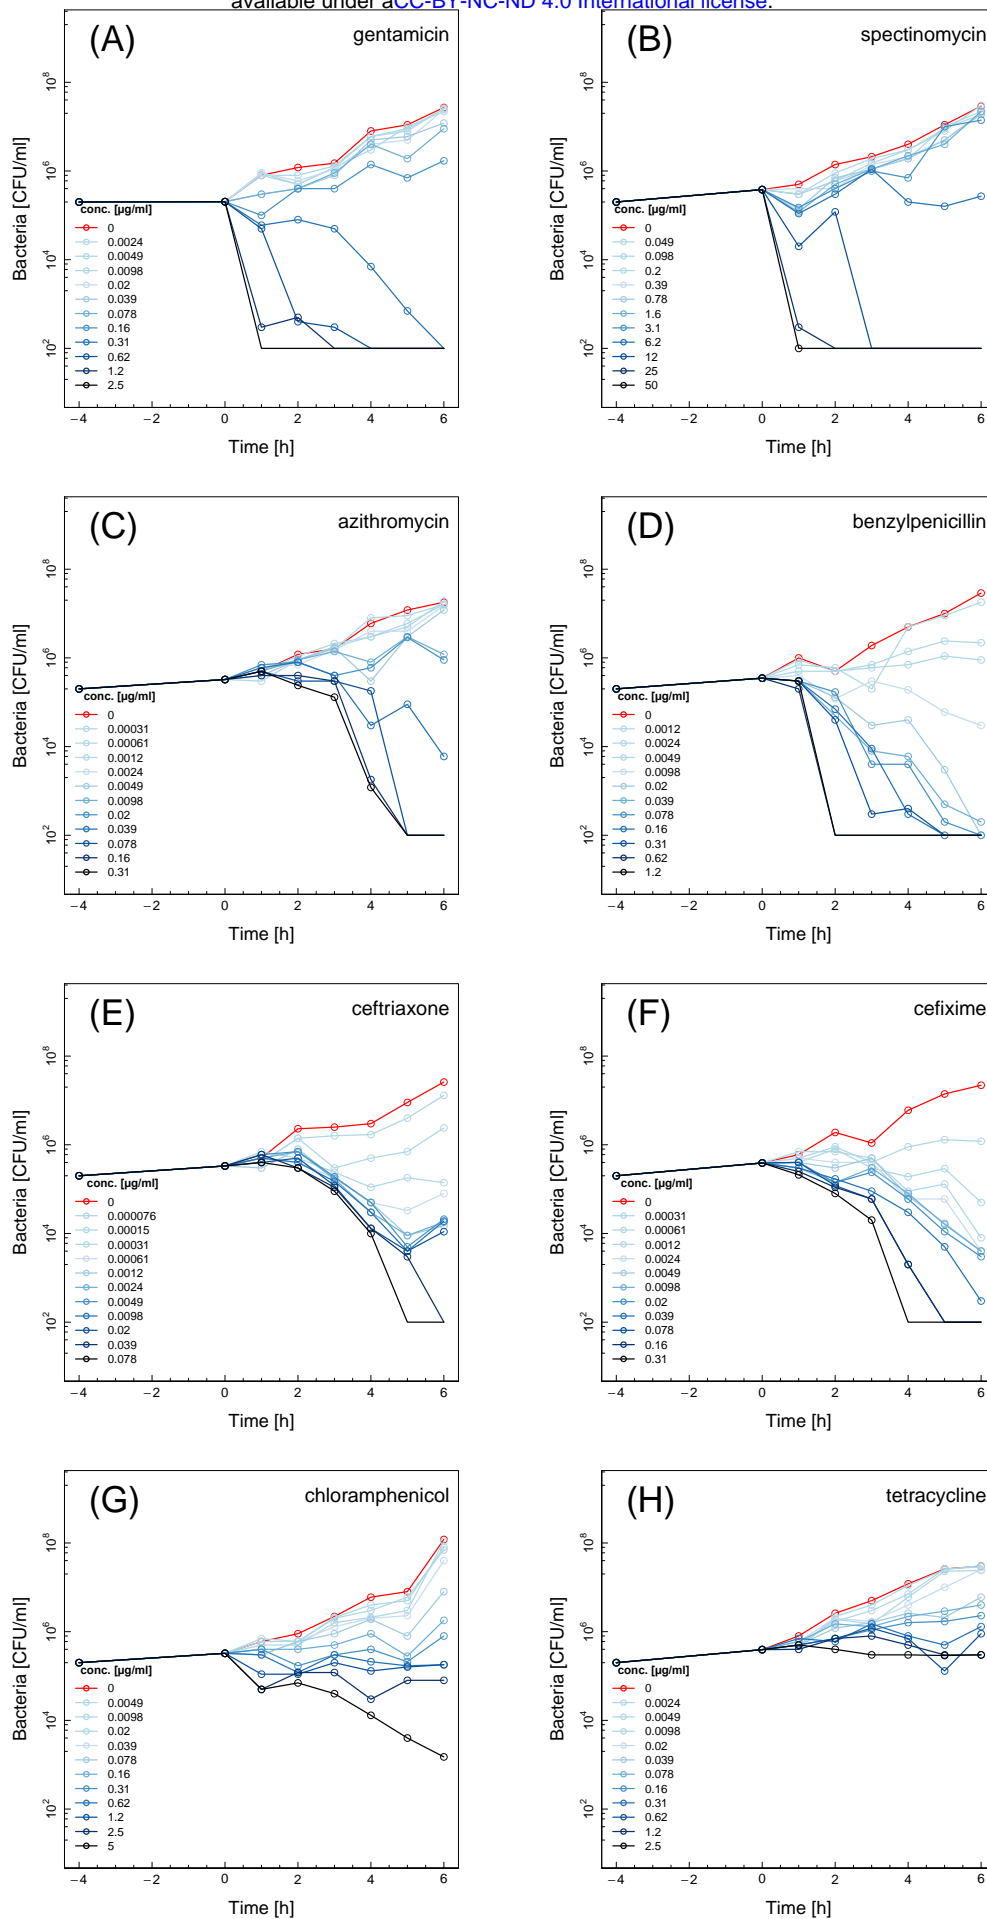

FIG 3 Time-kill curves for the *Neisseria gonorrhoeae* DOGK18 strain using eight different antimicrobials: gentamicin (A), spectinomycin (B), azithromycin (C), benzylpenicillin (D), ceftriaxone (E), cefixime (F), chloramphenicol (G) and tetracycline (H). Twelve doubling dilutions are plotted, the highest concentration (black line) corresponds to 16 MIC as measured with Etest. The limit of detection in the assay was 100 CFU/ml. Antimicrobial was added at time 0 h.



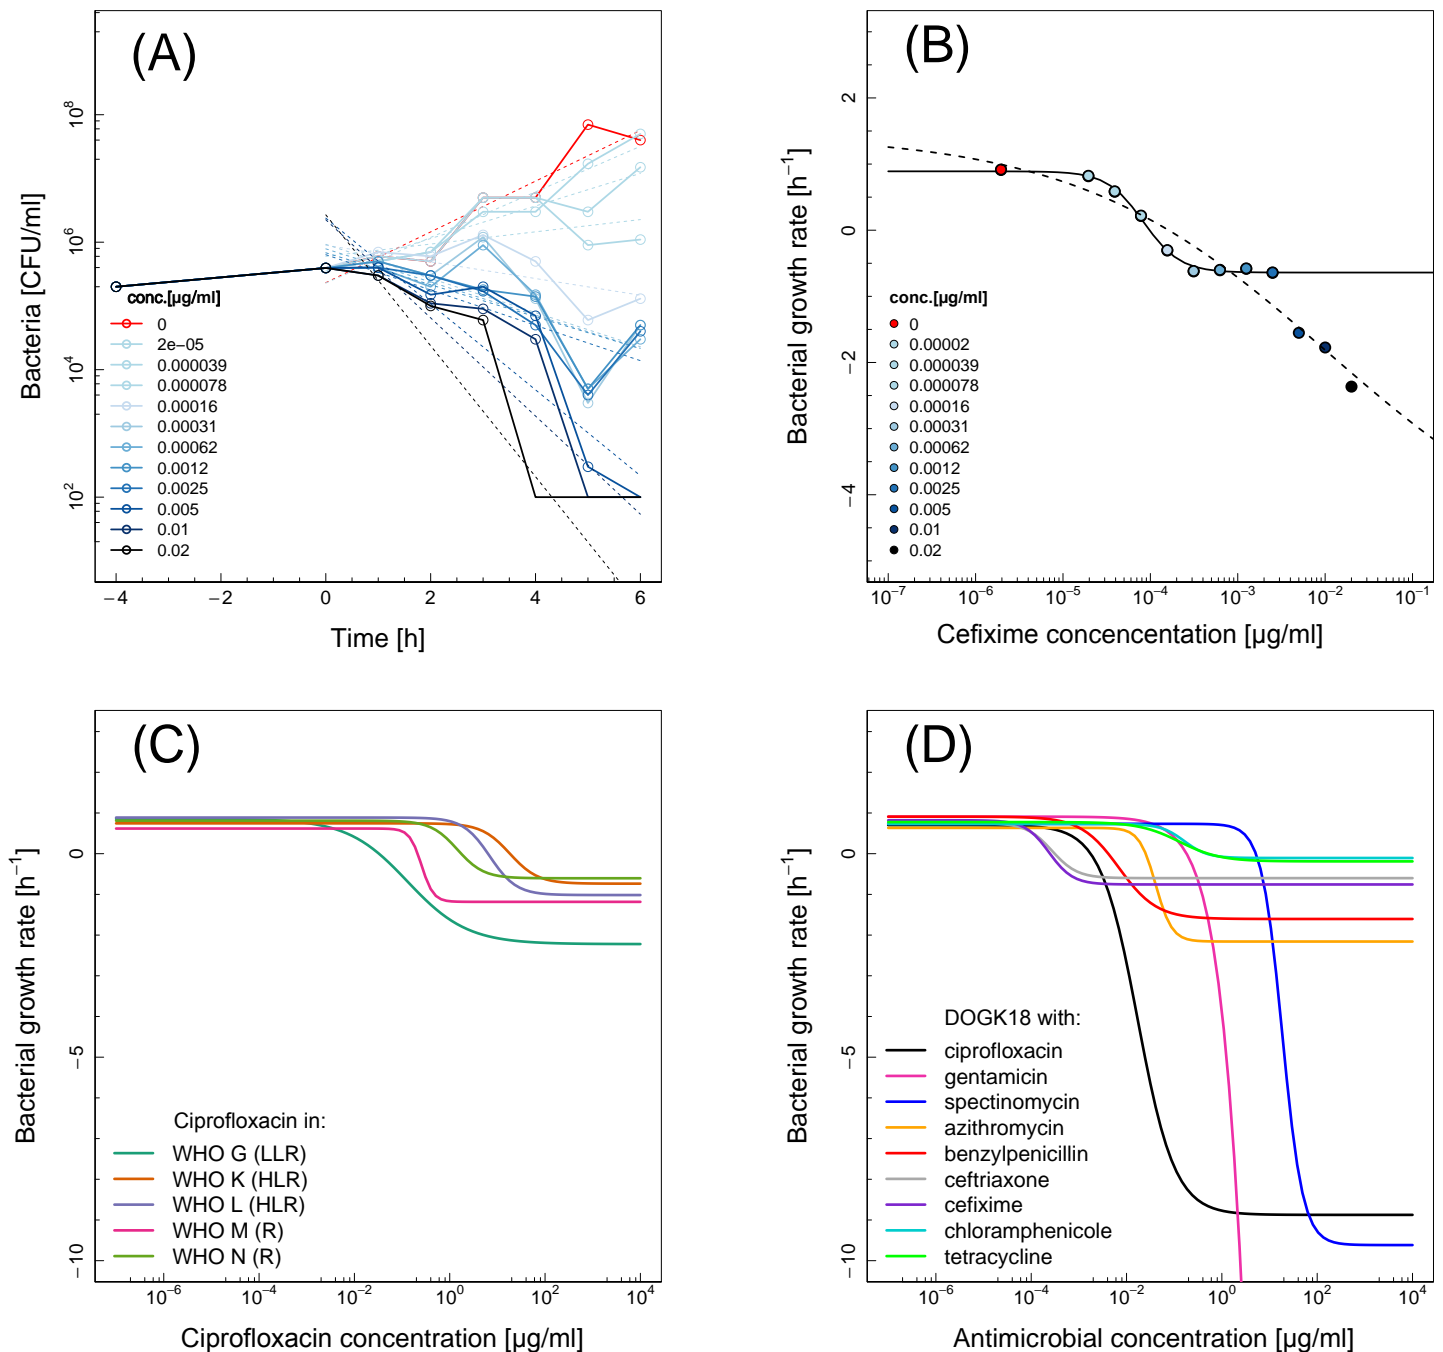

FIG 4 Pharmacodynamic functions for different antimicrobials and *Neisseria gonorrhoeae* strains. (A) Estimating growth rates (cefixime in DOGK18). Dashed lines represent linear regressions of the logarithm of the colony counts at different antimicrobial concentrations. The coefficient of the linear regression corresponds to the net bacterial growth rate (cefixime in DOGK18). (B) Fitting the pharmacodynamic function to estimated growth rates. Points correspond to the estimated net bacterial growth rates at different antimicrobial concentrations. The solid line shows the model fit after removing outliers at high antimicrobial concentrations. The dashed line indicates the model fit including all data points. The growth rate in absence of antimicrobial is shown in red at a concentration that is 10-fold lower than the lowest concentration. (C) Pharmacodynamics functions for ciprofloxacin in six *N. gonorrhoeae* strains (Low level resistance (LLR)=WHO G; High level resistance (HLR)=WHO K, WHO L; Resistance (R)=WHO M, WHO N; and Susceptible (S)= DOGK18) (D) Pharmacodynamic functions for nine different antimicrobials in DOGK18 strain. Each curve is based on the arithmetic mean of the estimated parameters from two independent time-kill experiments (as in Table 1).

# Supplemental Material

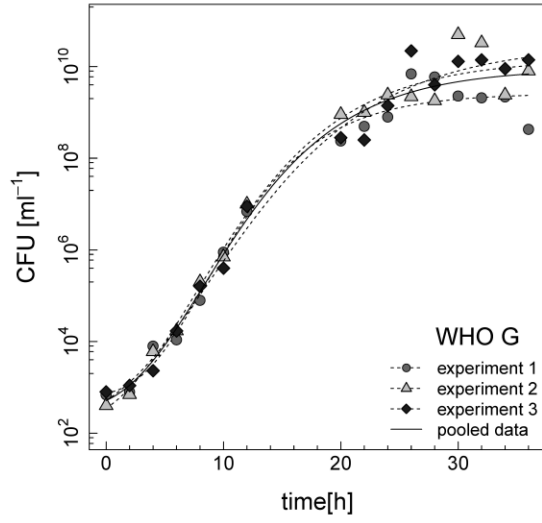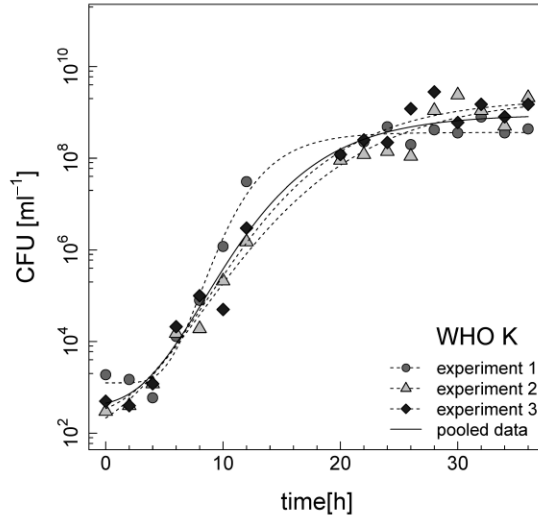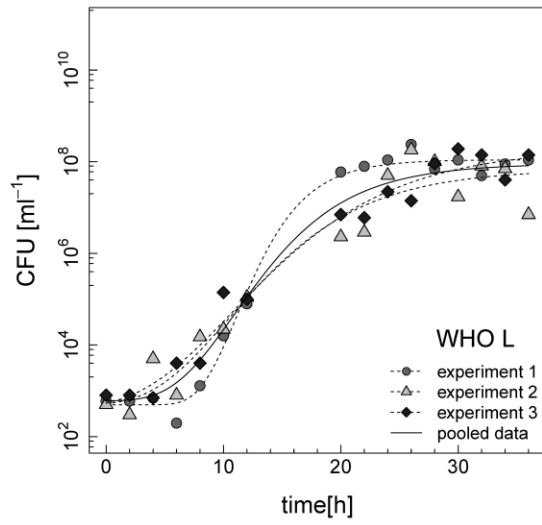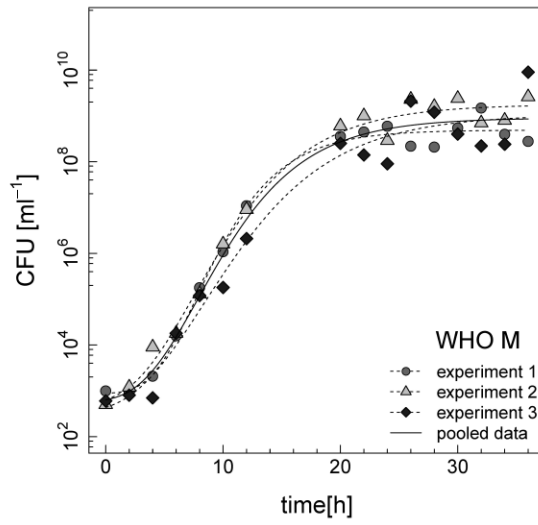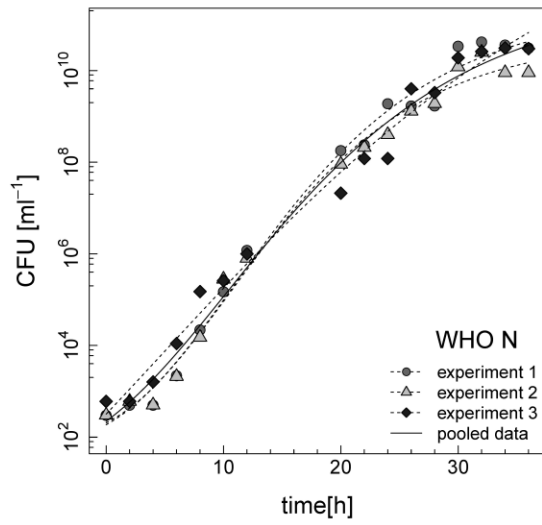

**Figure S1.** Growth curves for the 2008 WHO *Neisseria gonorrhoeae* reference strains WHO G (A), WHO K (B), WHO L (C), WHO M (D), WHO N (E). Data from three independent experiments are shown. CFU/ml for each time-point are shown in circles (experiment 1), triangles (experiment 2) and diamonds (experiment 3). A Gompertz growth model (1, 2) was fit to the data from three independent experiments (solid line, pooled data). Individual fits from each of the experiments are shown as well in dashed lines. Growth rates were estimated in log phase between 2-20 hours (WHO G=0.75 [h<sup>-1</sup>], WHO K=0.72 [h<sup>-1</sup>], WHO L=0.57 [h<sup>-1</sup>], WHO M=0.75 [h<sup>-1</sup>], WHO N=0.70 [h<sup>-1</sup>]). The maximal bacterial density was estimated as upper asymptote of the Gompertz model (WHO G=9.74\*10<sup>9</sup> [CFU/ml], WHO K=1.32\*10<sup>9</sup> [CFU/ml], WHO L=6.57\*10<sup>7</sup> [CFU/ml], WHO M=1.32\*10<sup>9</sup> [CFU/ml], WHO N=5.32\*10<sup>11</sup> [CFU/ml]).

**Table S1:** Parameter estimates for nine different antimicrobials in *Neisseria gonorrhoeae* strain DOGK18 and model based standard errors.

| Antimicrobial    | $\kappa$ | $\kappa$ SE | $\psi_{\max}$<br>[h <sup>-1</sup> ] | $\psi_{\max}$ SE<br>[h <sup>-1</sup> ] | $\psi_{\min}$<br>[h <sup>-1</sup> ] | $\psi_{\min}$ SE<br>[h <sup>-1</sup> ] | zMIC<br>[μg/ml] | zMIC SE<br>[μg/ml] |
|------------------|----------|-------------|-------------------------------------|----------------------------------------|-------------------------------------|----------------------------------------|-----------------|--------------------|
| Azithromycin     | 2.43     | 0.81        | 0.67                                | 0.08                                   | -2.25                               | 0.17                                   | 0.0267          | 0.0050             |
| Azithromycin     | 2.64     | 0.60        | 0.60                                | 0.06                                   | -2.07                               | 0.11                                   | 0.0238          | 0.0033             |
| Cefixime         | 2.07     | 0.23        | 0.89                                | 0.04                                   | -0.64                               | 0.03                                   | 0.0001          | 0.0000             |
| Cefixime         | 1.42     | 0.66        | 0.75                                | 0.17                                   | -0.87                               | 0.10                                   | 0.0004          | 0.0001             |
| Ceftriaxone      | 1.69     | 0.21        | 0.70                                | 0.05                                   | -0.74                               | 0.03                                   | 0.0002          | 0.0000             |
| Ceftriaxone      | 1.58     | 0.69        | 0.80                                | 0.08                                   | -0.46                               | 0.09                                   | 0.0004          | 0.0001             |
| Chloramphenicol  | 1.54     | 0.28        | 0.85                                | 0.03                                   | -0.12                               | 0.04                                   | 0.3767          | 0.1099             |
| Chloramphenicol  | 2.04     | 0.43        | 0.61                                | 0.02                                   | -0.10                               | 0.03                                   | 0.5762          | 0.1461             |
| Gentamicin       | 0.82     | 0.10        | 0.86                                | 0.20                                   | -206.80                             | 397.96                                 | 0.1522          | 0.3604             |
| Gentamicin       | 1.17     | 0.28        | 0.96                                | 0.19                                   | -7.96                               | 1.60                                   | 0.2117          | 0.0474             |
| Benzylpenicillin | 1.19     | 0.29        | 0.77                                | 0.15                                   | -2.06                               | 0.18                                   | 0.0053          | 0.0013             |
| Benzylpenicillin | 1.01     | 0.19        | 1.05                                | 0.11                                   | -1.15                               | 0.09                                   | 0.0029          | 0.0005             |
| Spectinomycin    | 2.41     | 0.11        | 0.76                                | 0.04                                   | -10.30                              | 0.22                                   | 5.6452          | 0.2181             |
| Spectinomycin    | 1.61     | 0.33        | 0.71                                | 0.22                                   | -8.94                               | 0.96                                   | 4.6836          | 1.2304             |
| Tetracycline     | 1.14     | 0.19        | 0.72                                | 0.03                                   | -0.25                               | 0.05                                   | 0.3259          | 0.0860             |
| Tetracycline     | 0.90     | 0.17        | 0.83                                | 0.04                                   | -0.13                               | 0.07                                   | 0.7067          | 0.3721             |
| Ciprofloxacin    | 1.04     | 0.21        | 0.98                                | 0.25                                   | -7.34                               | 0.70                                   | 0.0017          | 0.0005             |
| Ciprofloxacin    | 1.19     | 0.29        | 0.43                                | 0.29                                   | -10.40                              | 1.27                                   | 0.0018          | 0.0009             |

**Table S2:** Parameter estimates for ciprofloxacin in five WHO *Neisseria gonorrhoeae* reference strains and DOGK18, and model based standard errors.

| Strain | $K$  | $K$ SE | $\psi_{\max}$ | $\psi_{\max}$ SE | $\psi_{\min}$ | $\psi_{\min}$ SE | zMIC<br>[ $\mu\text{g/ml}$ ] | zMIC SE<br>[ $\mu\text{g/ml}$ ] |
|--------|------|--------|---------------|------------------|---------------|------------------|------------------------------|---------------------------------|
| WHO G  | 0.69 | 0.14   | 0.86          | 0.12             | -2.22         | 0.35             | 0.0327                       | 0.0094                          |
| WHO K  | 1.47 | 0.29   | 0.75          | 0.03             | -0.74         | 0.18             | 18.3111                      | 3.9561                          |
| WHO L  | 1.56 | 0.27   | 0.89          | 0.06             | -1.02         | 0.10             | 6.3510                       | 0.7475                          |
| WHO M  | 3.49 | 0.77   | 0.62          | 0.05             | -1.18         | 0.04             | 0.2122                       | 0.0142                          |
| WHO N  | 1.58 | 0.24   | 0.81          | 0.04             | -0.60         | 0.04             | 1.7405                       | 0.1912                          |
| DOGK18 | 1.19 | 0.29   | 0.43          | 0.29             | -10.40        | 1.27             | 0.0018                       | 0.0009                          |

## REFERENCES

1. **Gagneur J, Neudecker A.** 2012. cellGrowth: Fitting cell population growth models. R package version 1.12.0. **Available online:** <http://www.bioconductor.org/packages/release/bioc/manuals/cellGrowth/man/cellGrowth.pdf>
2. **Zwietering MH, Jongenburger I, Rombouts FM, van 't Riet K.** 1990. Modeling of the bacterial growth curve. *Appl Environ Microbiol* **56**:1875–1881.
